# Supplementary figures and images for: Social mobility and gonorrhoea in Germany during 2020
Source: HighWire-hosted journal article supplement (doi:10.1136/sextrans-2021-055159), 2021-09-11

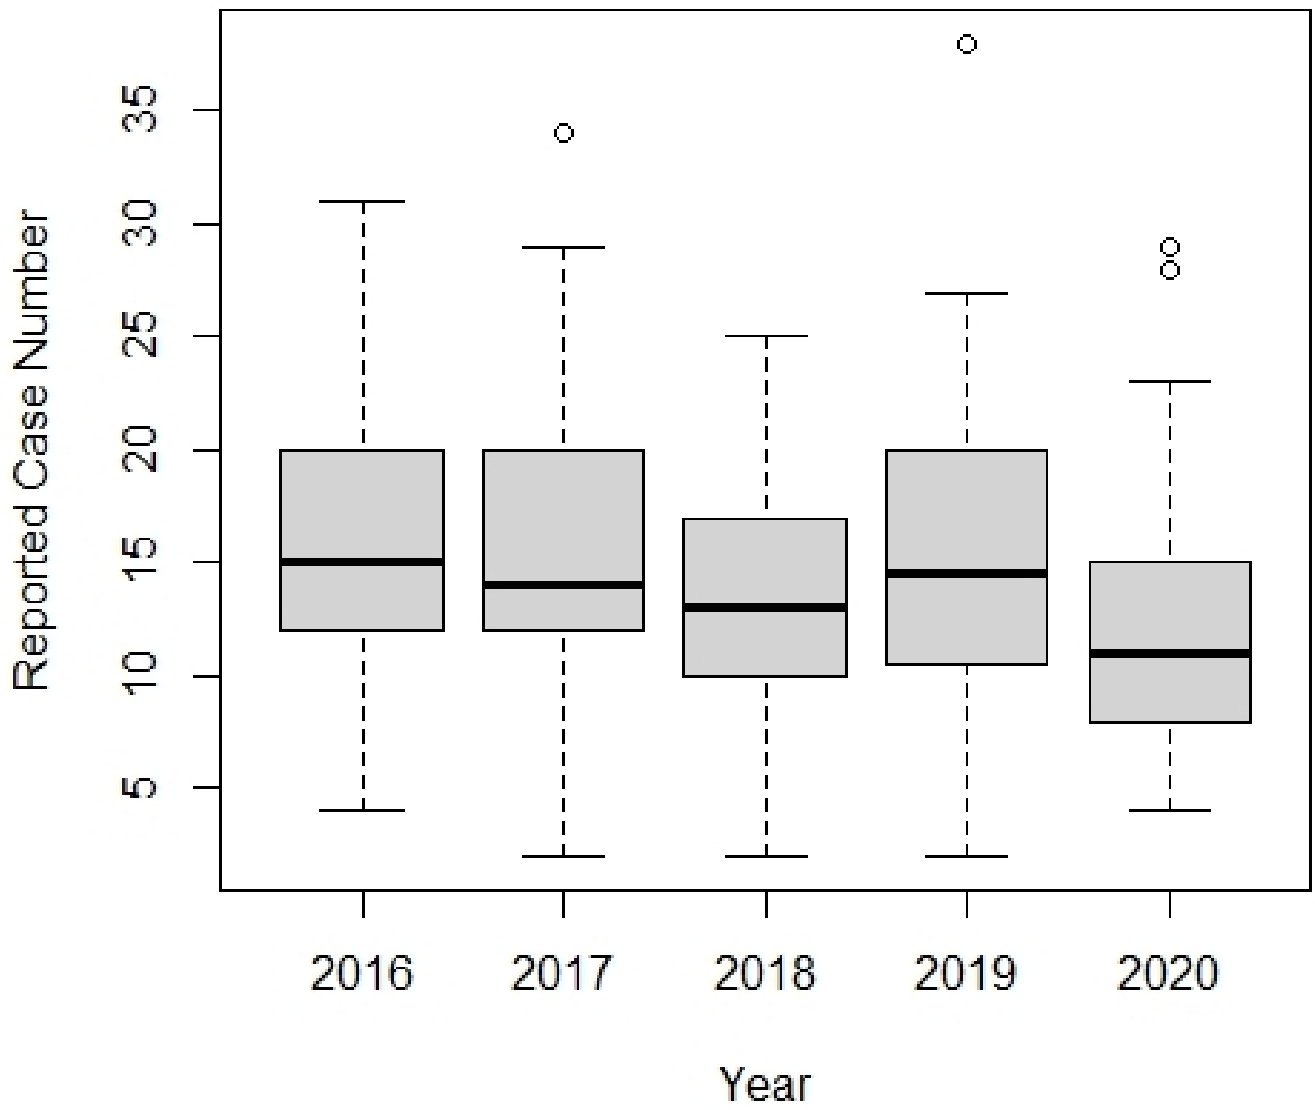

Supplement: sextrans-2021-055159supp002_data_supplement.pdf [file sextrans-2021-055159supp002_data_supplement.pdf]

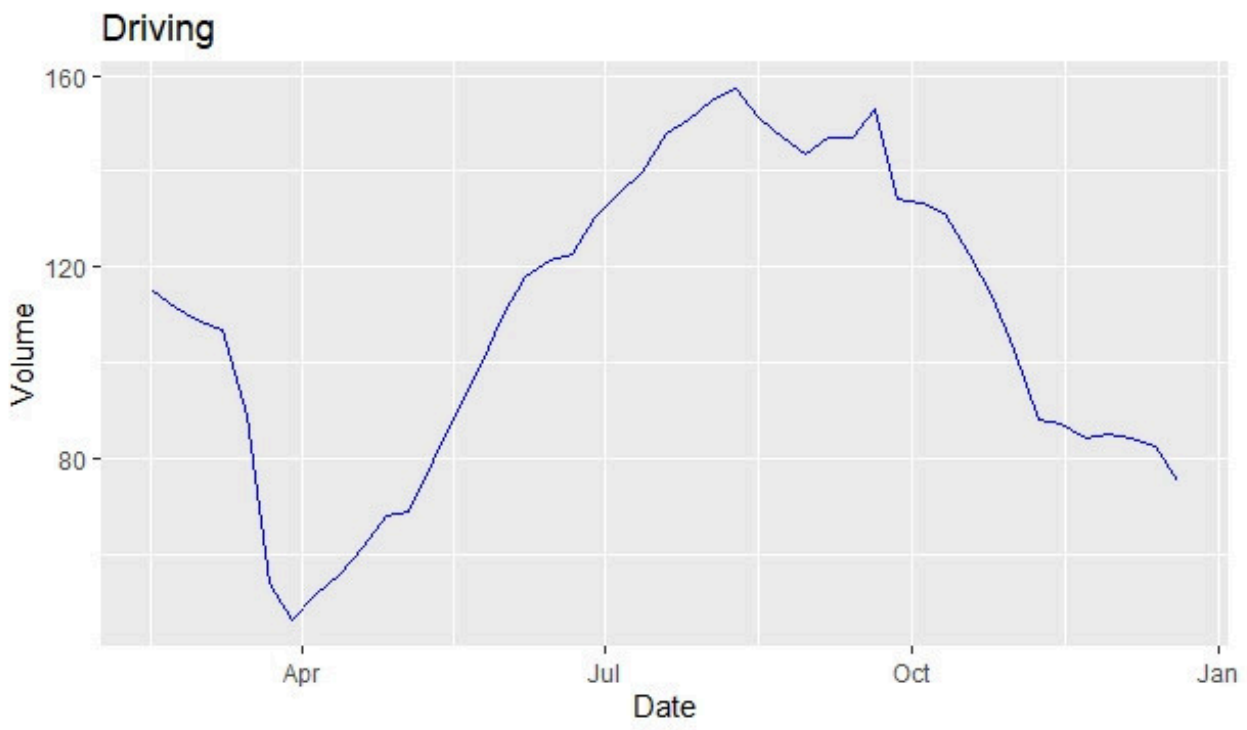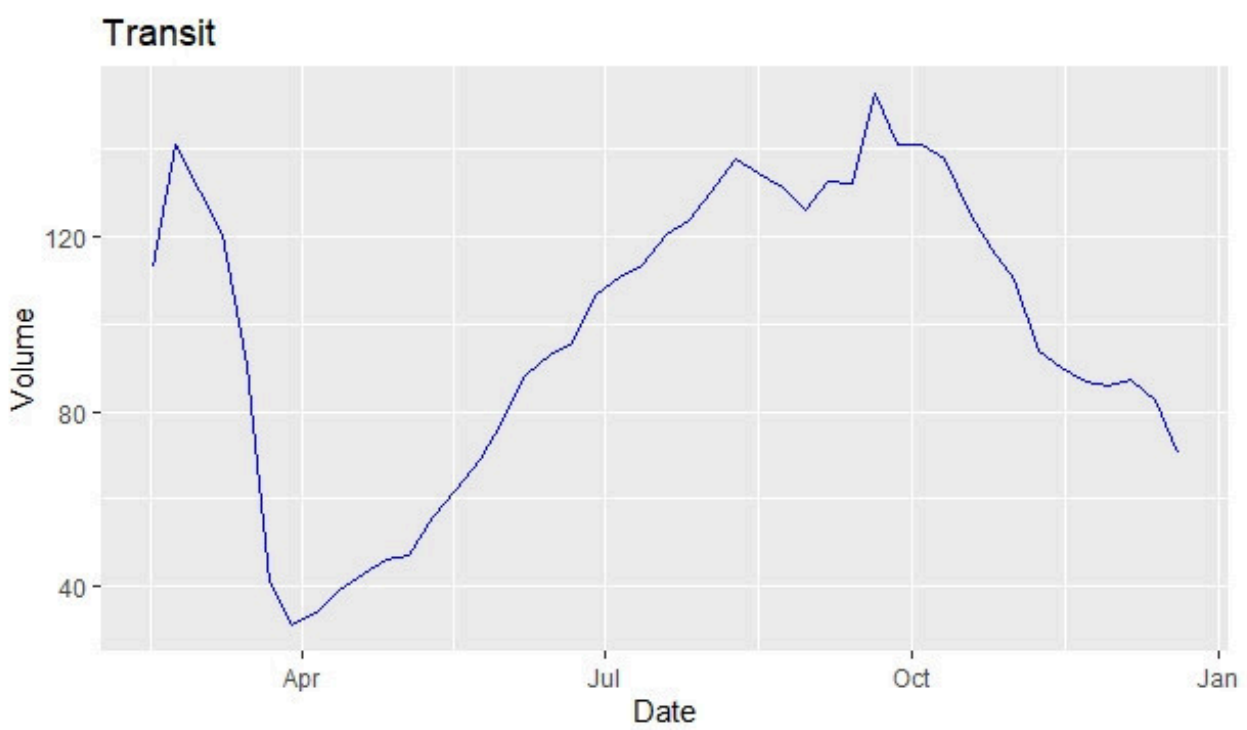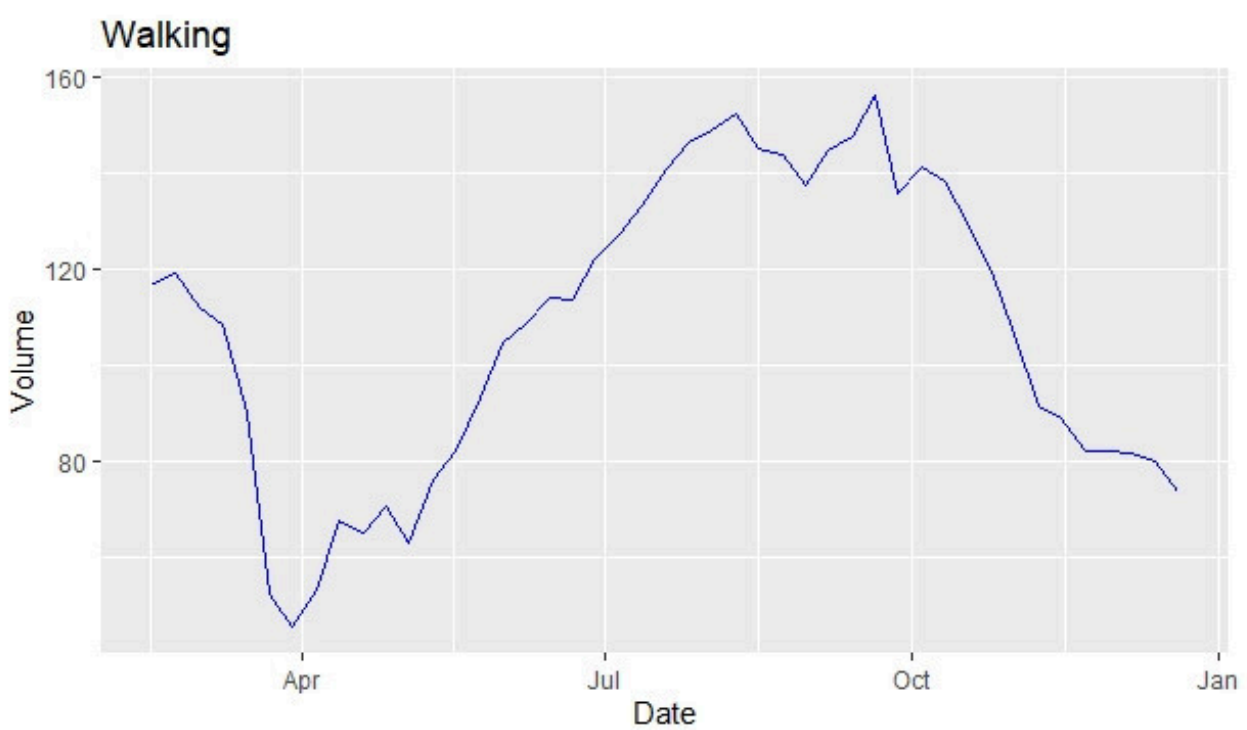

Supplement: sextrans-2021-055159supp005_data_supplement.pdf [file sextrans-2021-055159supp005_data_supplement.pdf]
